# Supplementary material for: Interprofessional primary care team meetings: a qualitative approach comparing observations with personal opinions
Source: PubMed Central journal article supplement — Fam Pract. 2016 Oct 18;34(1):98–106. doi: 10.1093/fampra/cmw106 (PMC5266085; doi:10.1093/fampra/cmw106), 2016-10-18
Supplement: supp_cmw106_Supplementary_data.pdf [file supp_cmw106_Supplementary_data.pdf]

**Supplementary Data File S1** Observation list to examine current practices in IPT meetings in primary care

|                |
|----------------|
| <b>Setting</b> |
| <b>Team:</b>   |
| <b>Date:</b>   |

| <b>Background variables</b>  |  |
|------------------------------|--|
| Setting                      |  |
| Duration in minutes          |  |
| Frequency of team meetings   |  |
| Number of participants       |  |
| Different disciplines        |  |
| Patient present?             |  |
| Number of patients discussed |  |
| Chairperson                  |  |
| Shared reporting             |  |

|                                                                                                                                                                                                                                                                                                                                                                                                                                                                                                                                                                                |
|--------------------------------------------------------------------------------------------------------------------------------------------------------------------------------------------------------------------------------------------------------------------------------------------------------------------------------------------------------------------------------------------------------------------------------------------------------------------------------------------------------------------------------------------------------------------------------|
| <p><b>Observation: Levels of communication (Remmerswaal)</b></p> <ul style="list-style-type: none"><li>➤ <b>Procedural level</b> refers to how the team works on the task, such as the methods and procedures used to achieve the goal, and the structure and organization of the meeting.</li><li>➤ <b>Content level</b> concerns the topic and content of the meeting and what happens in the team; which information is exchanged by the team members.</li><li>➤ <b>Interaction level</b> refers to the team process and to what happens between the team members</li></ul> |
|--------------------------------------------------------------------------------------------------------------------------------------------------------------------------------------------------------------------------------------------------------------------------------------------------------------------------------------------------------------------------------------------------------------------------------------------------------------------------------------------------------------------------------------------------------------------------------|

## **Supplementary Data File 2** Semi-structured interview guide to explore team members' experiences with

### IPT meetings

- Introduction
  - o Introduction by the interviewer
  - o Consent for audio recording
  - o Explanation of participants' rights
  - o Aim of the interview: The aim is to explore your experience, viewpoints, and facilitators and barriers for IPC
  - o Procedure, duration etc.
  - o Definition of IPC: We define interprofessional collaboration as "Multiple health care workers from different professional backgrounds working together with patients, families, caregivers and communities to deliver the highest quality of care".
  - o Clarification that all information is relevant

### **Main questions:**

1. *How did you experience the IPT meeting which has just taken place?*
2. *According to you, what are relevant factors that influence the process of IPC (relating to the development of patient-centred care plans) in primary care?*
3. *What do you experience as barriers/facilitators with regard to the process of IPC (regarding the development of patient-centred care plans) in primary care?*

### **Subquestions:**

- *Can you give an example?*
- *Can you explain in detail what you mean by...?*
- *Why do you experience...as a relevant factor/barrier/facilitator?*

### **Summary:**

Interviewer provides a summary.

- *Did I forget any relevant information in this summary?*
